# Supplementary material
Source: PubMed Central journal article supplement (PMC4480785)
Supplement: NIHMS651265-supplement.pdf [file NIHMS651265-supplement.pdf]

Supplementary Material for:  
**Surprisingly Facile C-H Activation in the Course of Oxime-Directed Catalytic Asymmetric Hydroboration**

Nathan C. Thacker, Veronika Shoba, Andrew E. Geis, and James M. Takacs

Department of Chemistry, University of Nebraska-Lincoln, NE 68588-0304

**General information**

Reactions were carried out in a dry atmosphere (N<sub>2</sub>). Dichloromethane (DCM), tetrahydrofuran (THF), and methanol (MeOH) were freshly distilled under the following conditions: DCM from calcium hydride, THF from sodium metal and benzophenone, and MeOH from Mg. All synthesized compounds were purified with flash chromatography with the indicated solvents using EMD Silica Gel 60 Geduran®. Thin layer chromatography analyses were performed on Analtech Silica Gel HLF (0.25 m) precoated analytical plates and visualized with use of handheld short wavelength UV light, vanillin stain (ethanol, H<sub>2</sub>SO<sub>4</sub>, and vanillin), and ninhydrin stain (ethanol, acetic acid, and ninhydrin). All reactions were performed in a chemical fume hood or in a glovebox with a nitrogen environment. NMR spectra were recorded on either a 400 MHz or a 300 MHz Bruker Advance NMR spectrometer using CHCl<sub>3</sub> (δ 7.27 ppm), CDCl<sub>3</sub> (δ 77.0 ppm), or CH<sub>2</sub>Cl<sub>2</sub> (δ 5.30 ppm) for reference. Gas chromatography analysis was performed with a CP-Chirasil-Dex CB column (I.D. = 0.25 mm) using a temperature program of 140-200 °C at 1 °C/min. Peaks are expressed as m (unresolved multiplet), q (quartet), t (triplet), d (doublet), s (singlet), bs (broad singlet). IR spectra were recorded using an Avatar 360 FT-IR. Optical rotations were measured in solutions, 1.0 g/100 mL CH<sub>3</sub>Cl unless indicated otherwise, and recorded using an Autopol III automatic polarimeter. HRMS analyses were performed by the Nebraska Center for Mass Spectrometry. All phenolic tethers were prepared using procedures described in the literature.

## Typical Rh-CAHB reaction

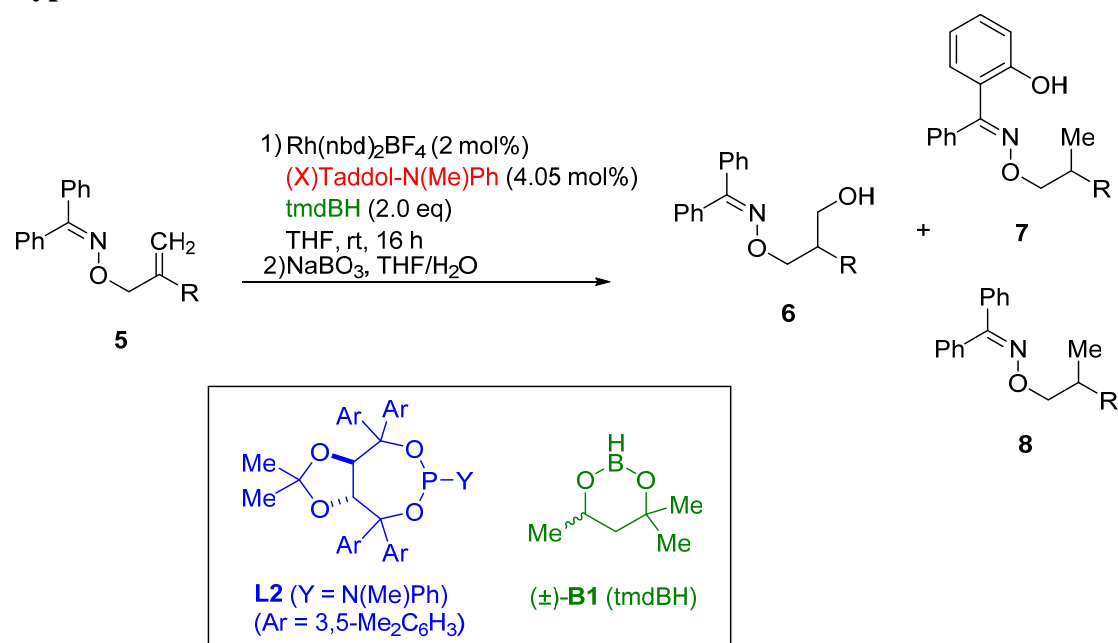

To a vial containing  $\text{Rh}(\text{nbd})_2\text{BF}_4$  (3.0 mg, 7.93  $\mu\text{mol}$ ) was added **L2** (11.4 mg, 16.0  $\mu\text{mol}$ ) in THF (1 mL) and stirred for 1 hour for complexation (solution changes from colorless to yellow instantaneously). A 1 mL aliquot of the resulting  $\text{Rh}[(\text{L2})_2(\text{nbd})]\text{BF}_4$  solution was added to a 50 mL round bottom flask with stir bar. The resulting yellow solution was added  $\beta,\gamma$ -unsaturated oxime **5a** (66.3 mg, 0.26 mmol) as a solution in THF (2 mL). The reaction mixture was stirred for 30 minutes at RT and then cooled in an ice bath. To the cooled solution (0 °C) was added dropwise (over the course of 20 minutes) a solution of 4,4,6-trimethyl-1,3,2-dioxaborinane ( $\text{tmdBH}$ , **B1**, 67.6 mg, 0.53 mmol) in THF (1 mL). The mixture was allowed to warm to room temperature and stirred for 4 hours. Afterwards, the reaction mixture was concentrated and reduced product **8** was separated via flash chromatography on silica gel (20:80 EtOAc/hexanes) as a clear oil. The inseparable ortho-borylated and  $\gamma$ -borylated products were concentrated and added a 1:3 water/THF mixture.  $\text{NaBO}_3$ -monohydrate (300 mg, 300  $\mu\text{mol}$ ) was added and the reaction mixture was stirred vigorously. After a 6 hour stir, the resultant mixture was extracted with EtOAc (3 x 15 mL) and the combined organic extracts were dried with  $\text{Na}_2\text{SO}_4$ , filtered, and concentrated under reduced pressure. The crude reaction mixture was purified via flash chromatography on silica gel (20:80 EtOAc/hexanes) afforded **6** and **7** as colorless oils.

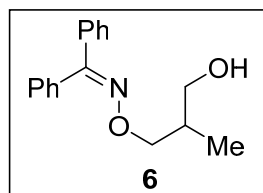

**Benzophenone O-(3-hydroxy-2-methylpropyl) oxime** ( $\gamma$ -hydroxylated product **6**)  $\beta,\gamma$ -unsaturated substrate **5a** (66.3 mg, 0.24 mmol) was converted to  $\gamma$ -hydroxylated product **6** (40.7 mg, 57%) as a colorless oil. TLC analysis (30:70 EtOAc/hexanes) showed a spot at  $R_f$  0.3;  $^1\text{H}$  NMR (400 MHz,  $\text{CDCl}_3$ )  $\delta$  7.50-7.33 (10H, m), 4.29 and 4.13 (2H, ddd,  $J_1 = 4.6 = \text{Hz}$ ,  $J_2 = 7.5$

Hz), 3.64-3.52 (2H, m), 2.18-2.11 (1H, m), 2.01 (1H, t,  $J = 5.5$  Hz), 0.94 (3H, d,  $J = 7.0$  Hz);  $^{13}\text{C}$  NMR (100 MHz,  $\text{CDCl}_3$ )  $\delta$  157.2, 136.1, 133.3, 129.5, 128.9, 128.9, 128.3, 128.2, 127.8, 77.9, 66.3, 35.8, 13.5; IR (neat) 3360 (O-H stretch), 3041 (C-H aromatic stretch), 2924 (C-H aliphatic), 1585 (C=N stretch), 1434 (N-O stretch), 989 (C-O stretch)  $\text{cm}^{-1}$ .

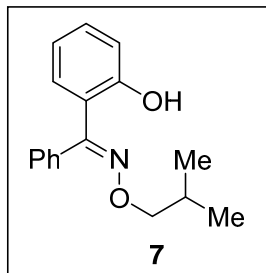

**(2-hydroxyphenyl)(phenyl methanone O-isobutyl oxime** (*Ortho*-hydroxylated and reduced product **7**)  $\beta,\gamma$ -unsaturated substrate **5a** (66.3 mg, 0.24 mmol) was converted to *ortho*-hydroxylated / reduced product **7** (22.3 mg, 31%) as a colorless oil. TLC analysis (10:90 EtOAc/hexanes) showed a spot at  $R_f$  0.8;  $^1\text{H}$  NMR (400 MHz,  $\text{CDCl}_3$ )  $\delta$  11.2 (1H, s), 7.52-7.47 (3H, m), 7.32-7.24 (3H, m), 7.03 (1H, d,  $J = 8.9$  Hz), 6.84-6.77 (1H, m), 6.73 (1H, t,  $J = 8.0$  Hz), 3.94 (2H, d,  $J = 6.9$  Hz), 2.10-2.00 (1H, m), 0.90 (2H, d,  $J = 6.7$  Hz);  $^{13}\text{C}$  NMR (100 MHz,  $\text{CDCl}_3$ )  $\delta$  160.3, 158.2, 132.0, 130.7, 130.5, 128.9, 128.4, 128.3, 118.8, 118.8, 117.1, 81.5, 27.9, 19.0; IR (neat) 3055 (C-H aromatic stretch), 2958 (C-H aliphatic), 1588 (C=N stretch), 1438 (N-O stretch), 996 (C-O stretch)  $\text{cm}^{-1}$ .

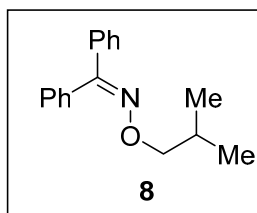

**Benzophenone O-isobutyl oxime** (Reduced product **8**)  $\beta,\gamma$ -unsaturated substrate **5a** (66.3 mg, 0.24 mmol) was converted to reduced product **8** (6.8 mg, 10%) as a colorless oil. TLC analysis (10:90 EtOAc/hexanes) showed a spot at  $R_f$  0.9;  $^1\text{H}$  NMR (400 MHz,  $\text{CDCl}_3$ )  $\delta$  7.51-7.31 (10H, m), 3.98 (2H, d,  $J = 6.8$  Hz), 2.12-2.02 (1H, m), 0.93 (6H, d,  $J = 6.7$  Hz);  $^{13}\text{C}$  NMR (100 MHz,  $\text{CDCl}_3$ )  $\delta$  156.1, 136.44, 135.6, 129.3, 129.1, 128.6, 128.2, 128.0, 127.8, 81.2, 28.1, 19.2; IR (neat) 3054 (C-H aromatic stretch), 2958 (C-H aliphatic), 1588 (C=N stretch), 1438 (N-O stretch), 996 (C-O stretch)  $\text{cm}^{-1}$ .

benzophenone oxime- Me substituent-gammaOH-1H

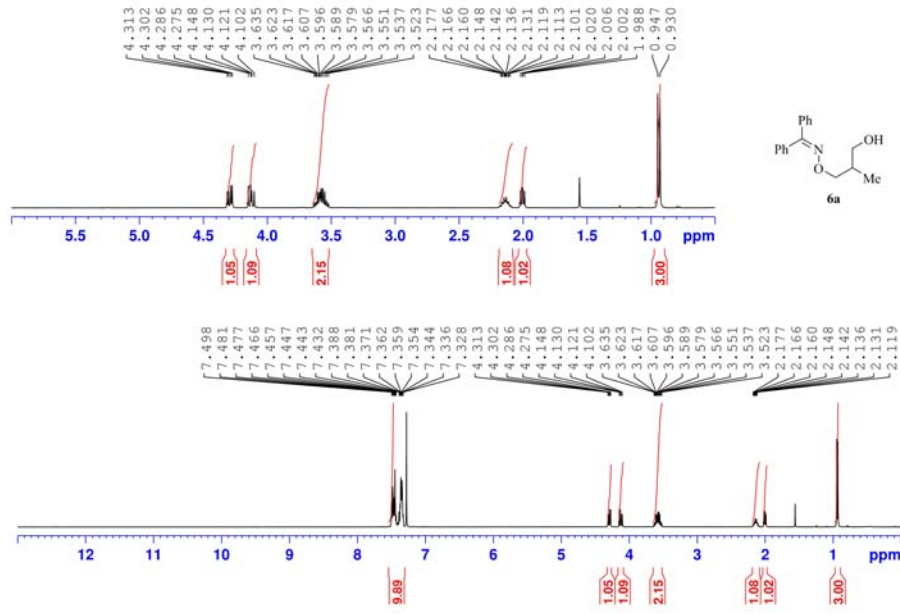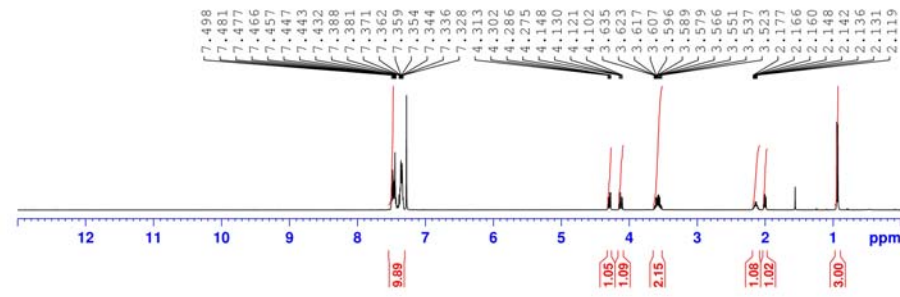

H10Benzophenone - Methyl Substituent - GammaOH - 13C

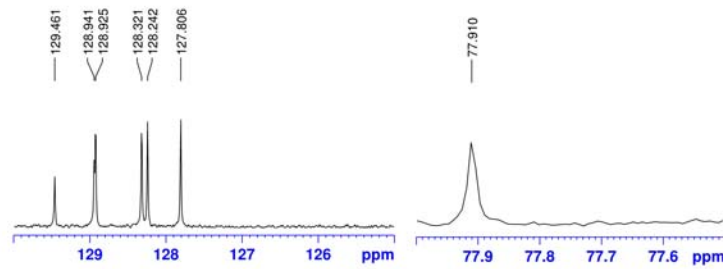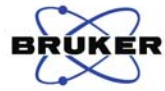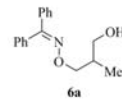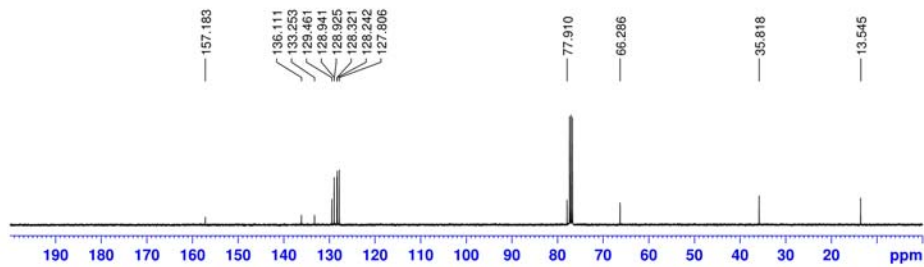

H10Benzophenone - Methyl Substituent - GammaOH - HSQC

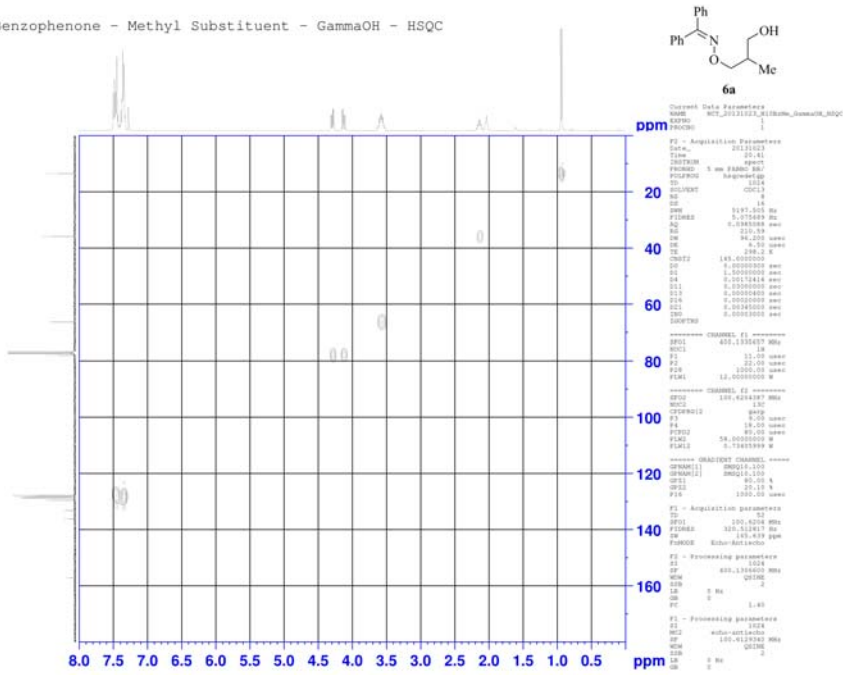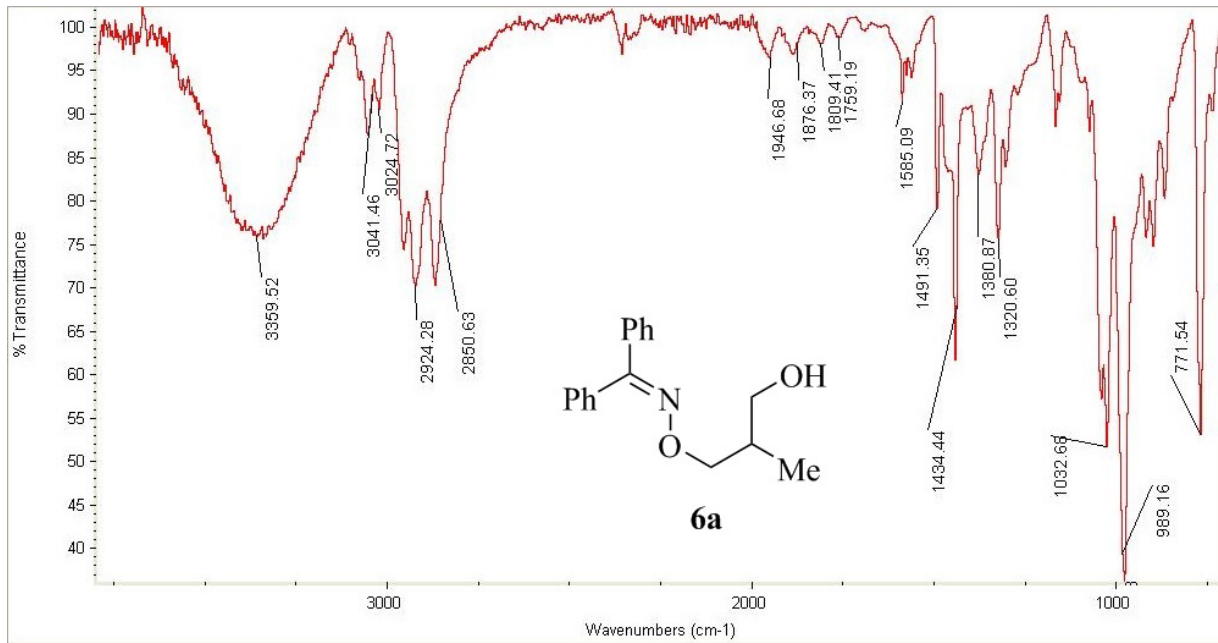

benzophenone oxime- Me substituent-ortho-OH Reduced- 1H

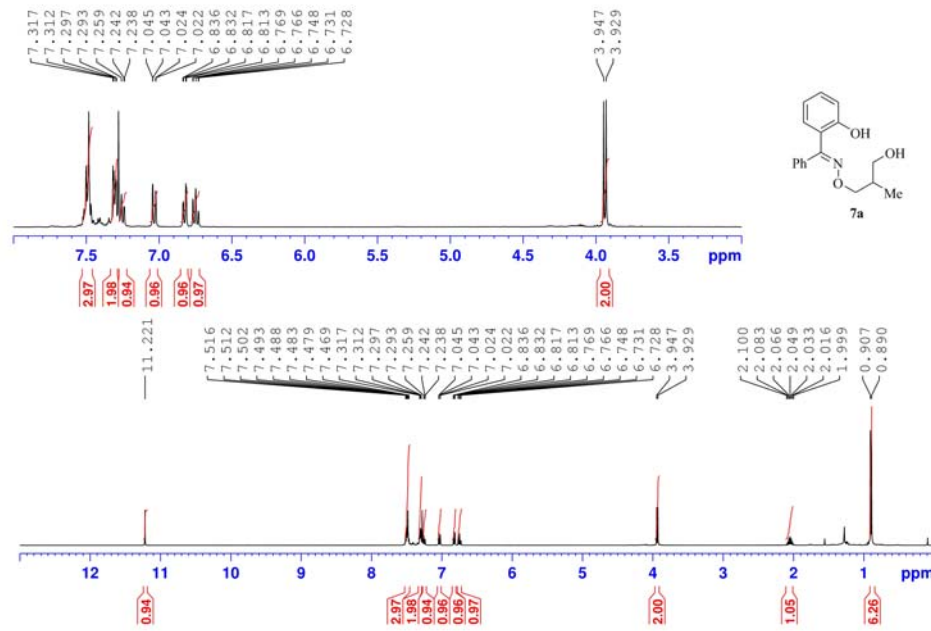

benzophenone oxime- Me substituent-ortho-OH Reduced- 13C

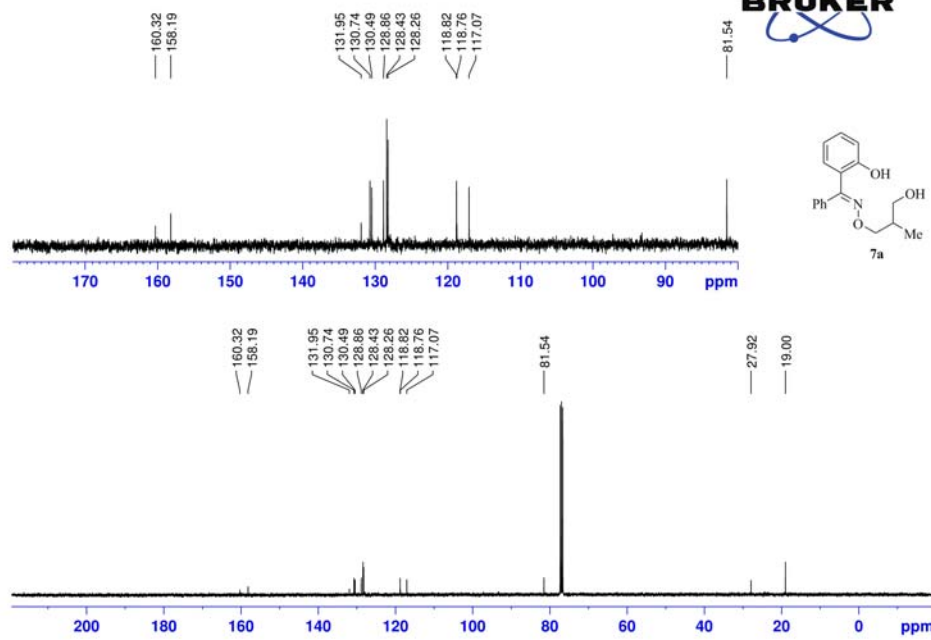

benzophenone oxime- Me substituent-ortho-OH Reduced- HSQC

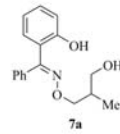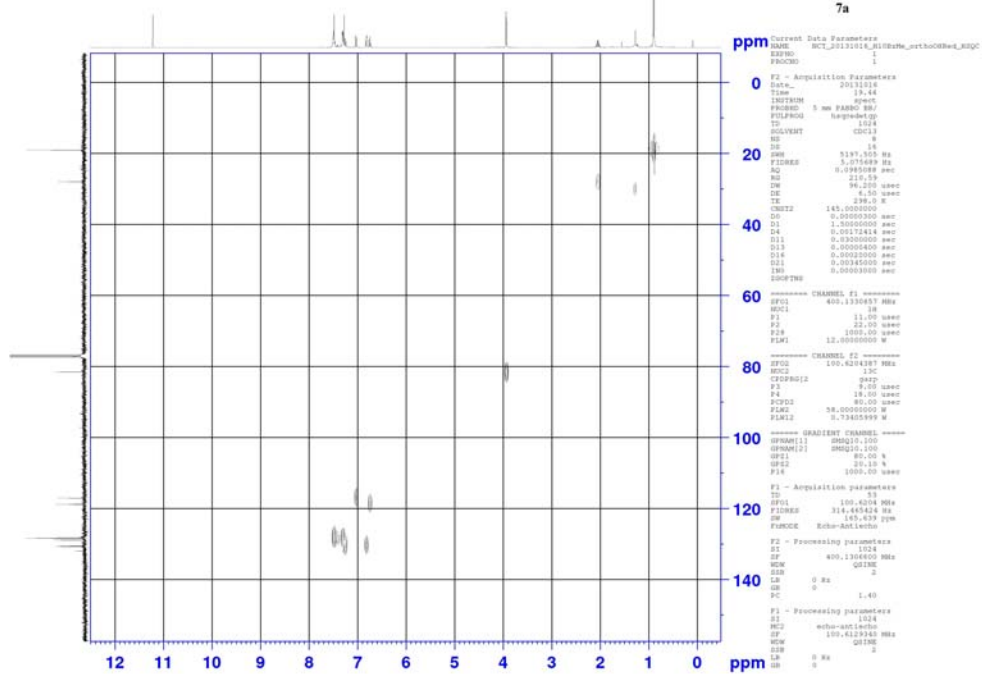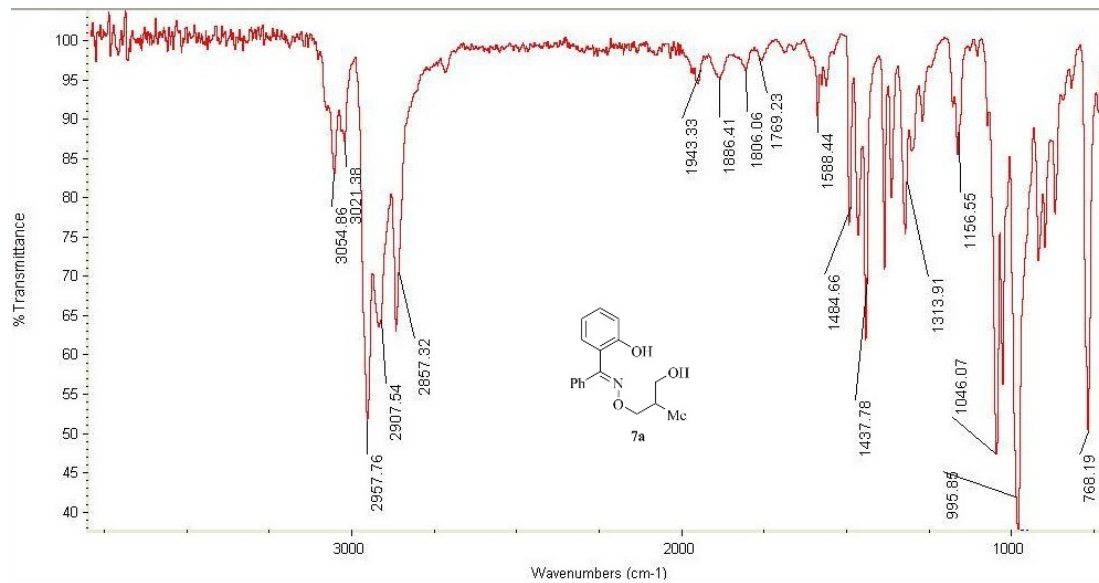

benzophenone oxime- Me substituent-Reduced- 1H

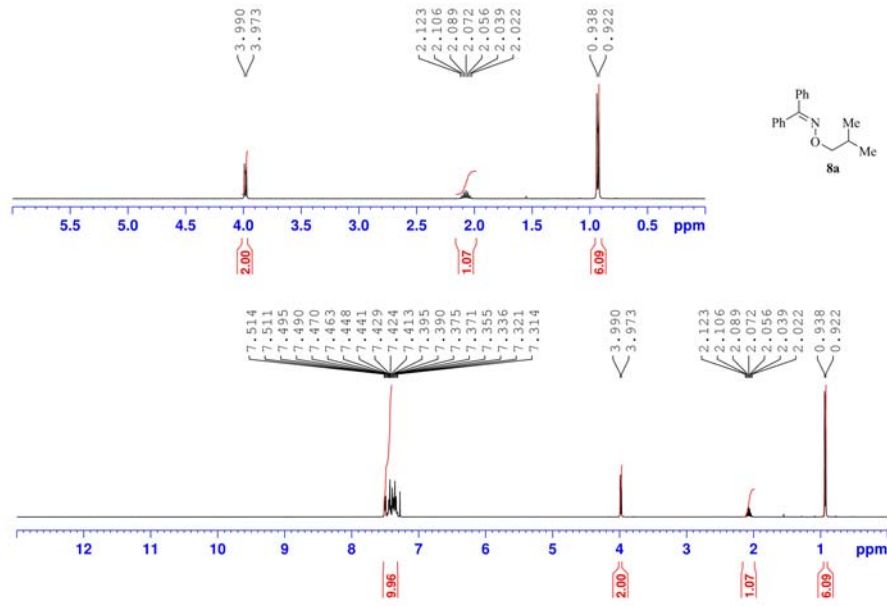

benzophenone oxime- Me substituent-Reduced- 13C

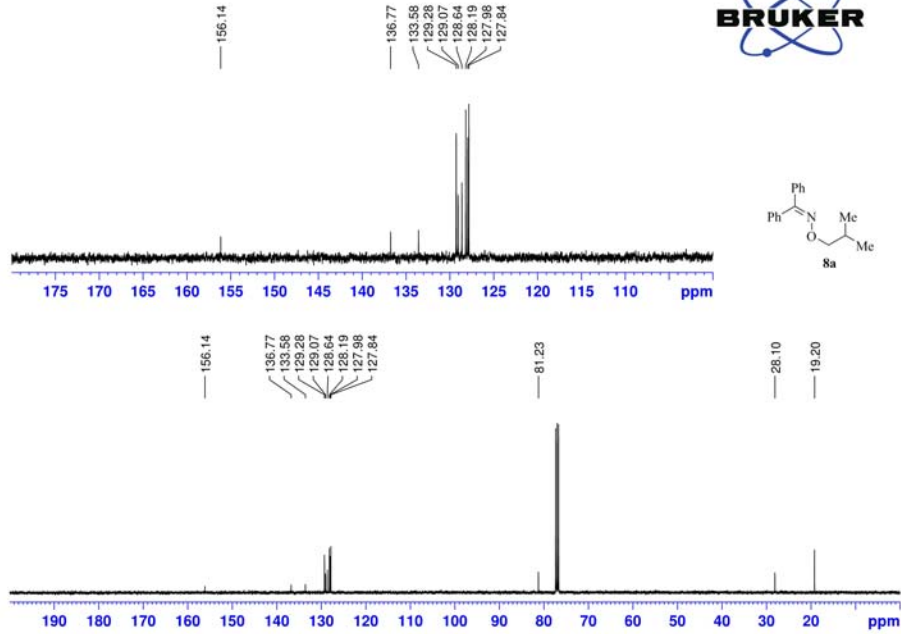



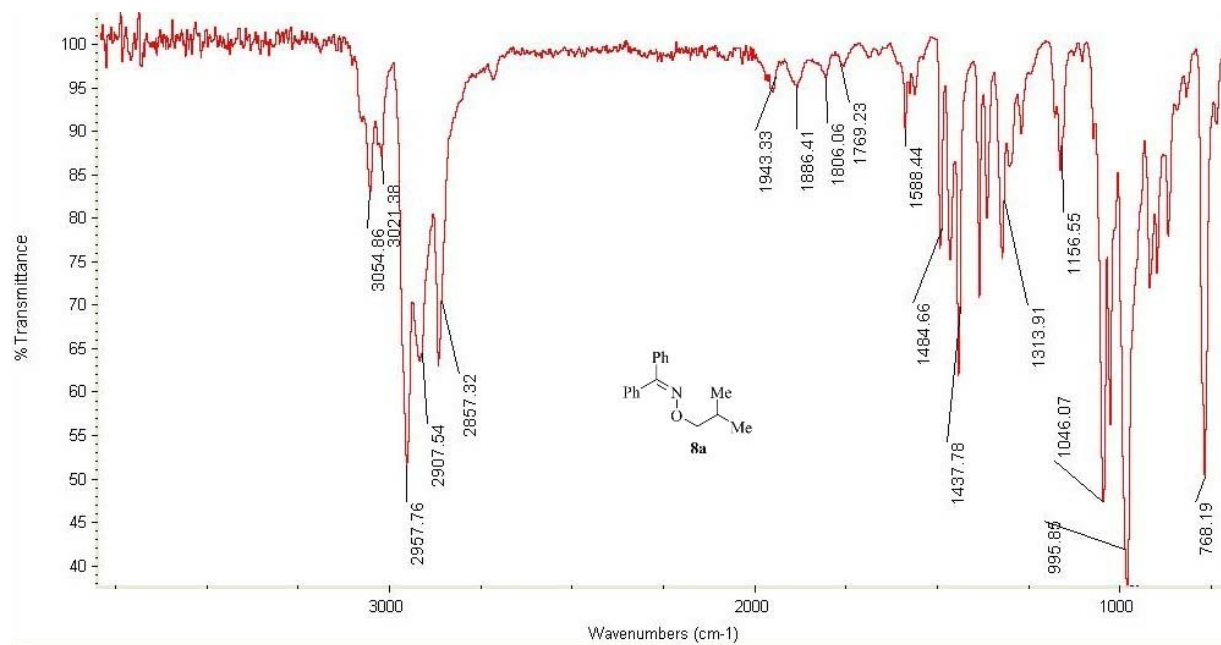

**Rh-CAHB of deuterated benzophenone derivatives with tmdB-H**

Using a procedure for typical Rh-CAHB with deuterium-labeled substrate  $d^{10}$ -**10** and tmdBH, the products isolated as described below.

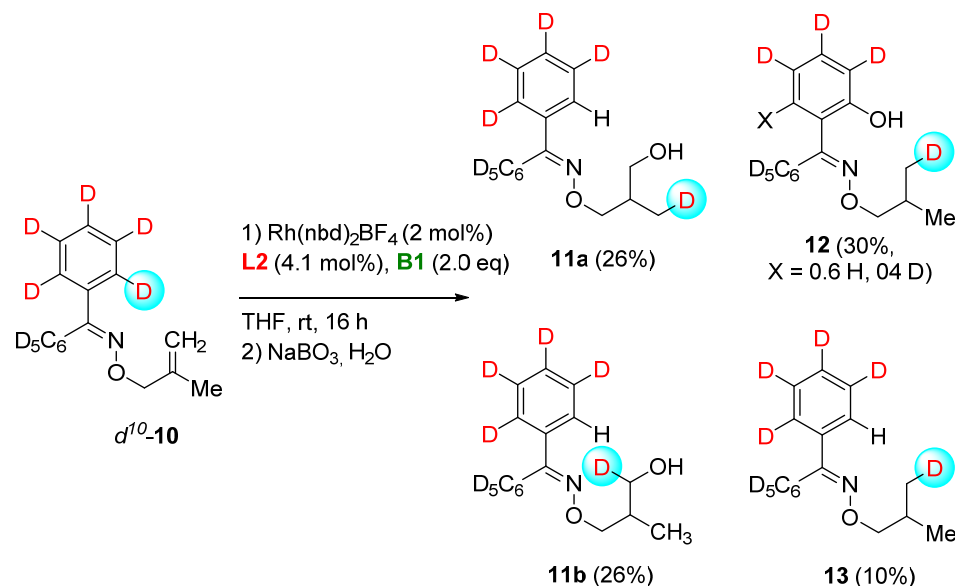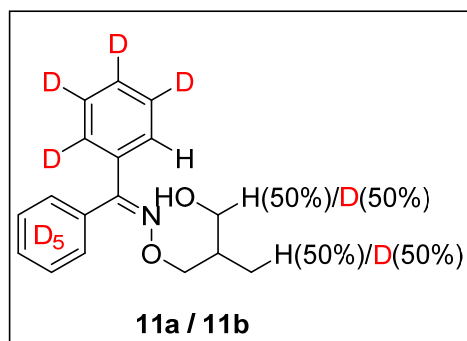

**$d^9$ H-Benzophenone O-(2-hydroxymethyl)-4-methylpentyl oxime** ( $\gamma$ -hydroxylated products **11a/11b**)  $\beta,\gamma$ -unsaturated substrate  $d^{10}$ -**10** (69.1 mg, 0.24 mmol) was converted to  $\gamma$ -hydroxylated products **11a/11b** (38.7 mg, 52%) as a colorless oil. TLC analysis (30:70 EtOAc/hexanes) showed a spot at R<sub>f</sub> 0.5; <sup>1</sup>H NMR (400 MHz, CDCl<sub>3</sub>)  $\delta$  7.49 (1H, s), 4.30 and 4.13 (2H, ddd,  $J_1 = 4.5$  Hz,  $J_2 = 10.9$  Hz), 3.62-3.53 (1.5H, m), 2.17-2.10 (1H, m), 2.04 (1H, bs), 0.95-0.92 (2.5H, m); <sup>13</sup>C NMR (100 MHz, CDCl<sub>3</sub>)  $\delta$  127.7, 77.9, 66.3, 35.8, 13.5; IR (neat) 3339 (O-H stretch), 2924 (C-H aliphatic), 1595 (C=N stretch), 1454 (N-O stretch), 972 (C-O stretch) cm<sup>-1</sup>.

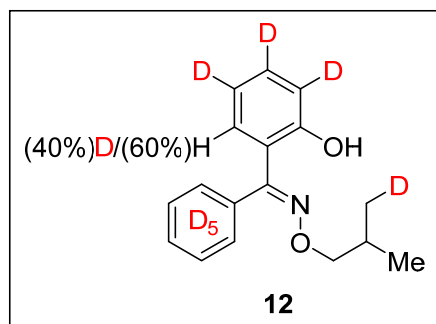

**(2-hydroxyphenyl)(phenyl methanone O-isobutyl oxime** (*ortho*-hydroxylated and reduced product **12**)  $\beta,\gamma$ -unsaturated substrate  $d^{10}$ -**10** (69.1 mg, 0.24 mmol) was converted to *ortho*-hydroxylated product **12** (22.2 mg, 30%) as a colorless oil. TLC analysis (30:70 EtOAc/hexanes) showed a spot at  $R_f$  0.85;  $^1\text{H}$  NMR (400 MHz,  $\text{CDCl}_3$ )  $\delta$  11.2 (1H, s), 6.83 (0.6H, s), 3.94 (2H, d,  $J = 6.9$  Hz), 2.09-1.99 (1H, m), 0.91-0.88 (4.7H, m);  $^{13}\text{C}$  NMR (100 MHz,  $\text{CDCl}_3$ )  $\delta$  160.3, 158.2, 131.8, 130.4, 128.3, 128.0, 127.8, 127.5, 118.8, 118.7, 81.5, 27.9, 27.8, 19.0, 18.9, 18.7, 18.5; IR (neat) 3085 (O-H phenol), 2920 (C-H aliphatic), 1585 (C=N stretch), 1441 (N-O stretch), 1025 (C-O stretch)  $\text{cm}^{-1}$ .

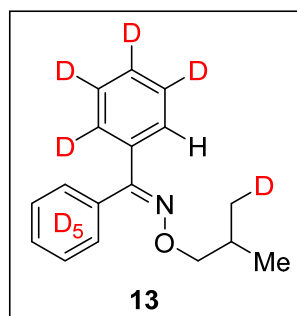

**( $d^9\text{H}$ )-Benzophenone O-isobutyl oxime** (reduced product **13**)  $\beta,\gamma$ -unsaturated substrate  $d^{10}$ -**10** (69.1 mg, 0.24 mmol) was converted to reduced product **13** (6.82 mg, 10%) as a colorless oil. TLC analysis (30:70 EtOAc/hexanes) showed a spot at  $R_f$  0.9;  $^1\text{H}$  NMR (400 MHz,  $\text{CDCl}_3$ )  $\delta$  7.50 (1H, s), 3.98 (2H, d,  $J = 6.7$  Hz), 2.11-2.02 (1H, m), 0.94-0.90 (5H, m);  $^{13}\text{C}$  NMR (100 MHz,  $\text{CDCl}_3$ )  $\delta$  127.7, 81.2, 28.0, 19.2.

D9HBenzophenone - Methyl Substituent - GammaOH - 1H

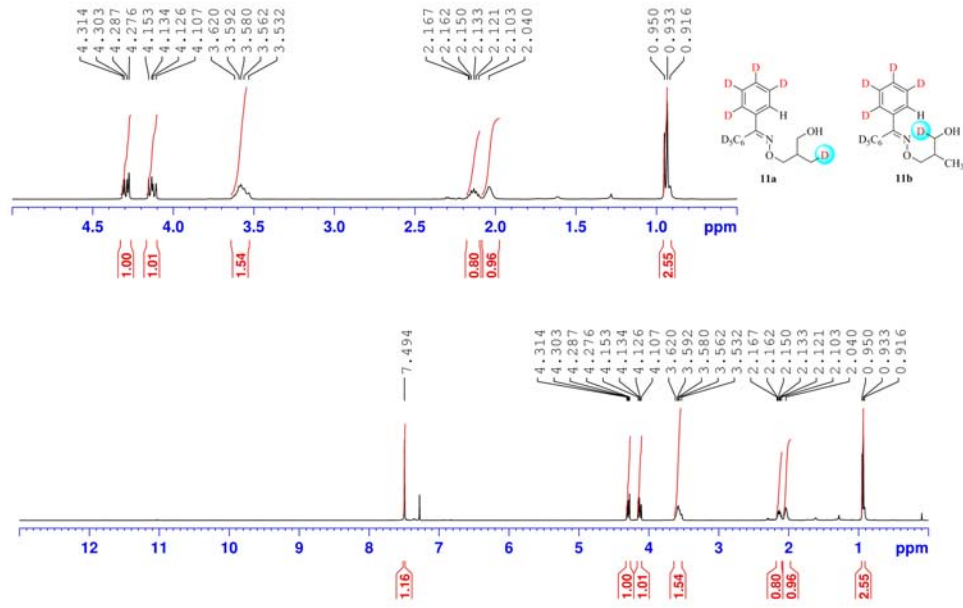

D9HBenzophenone - Methyl Substituent - GammaOH - 13C

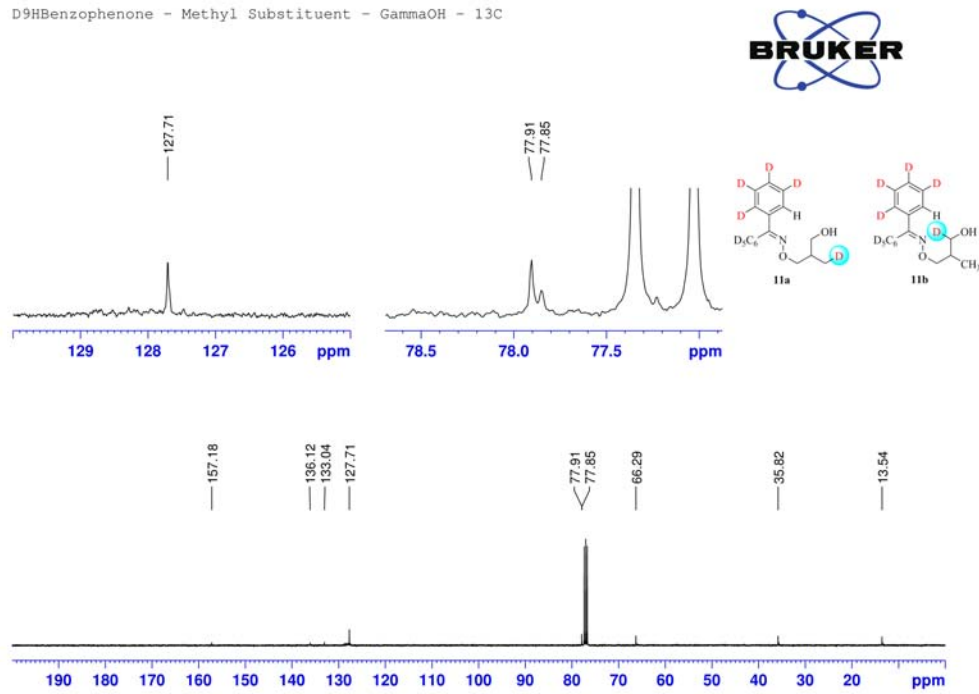

Supporting info for Thacker, Shoba, Geis, and Takacs

D9HBenzophenone - Methyl Substituent - GammaOH - HSQC

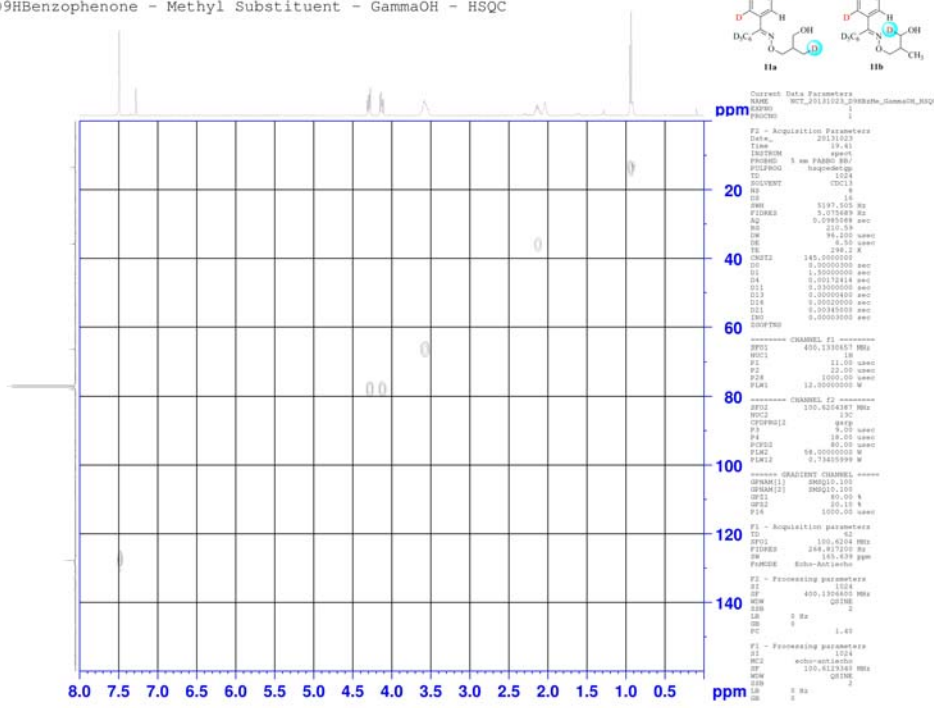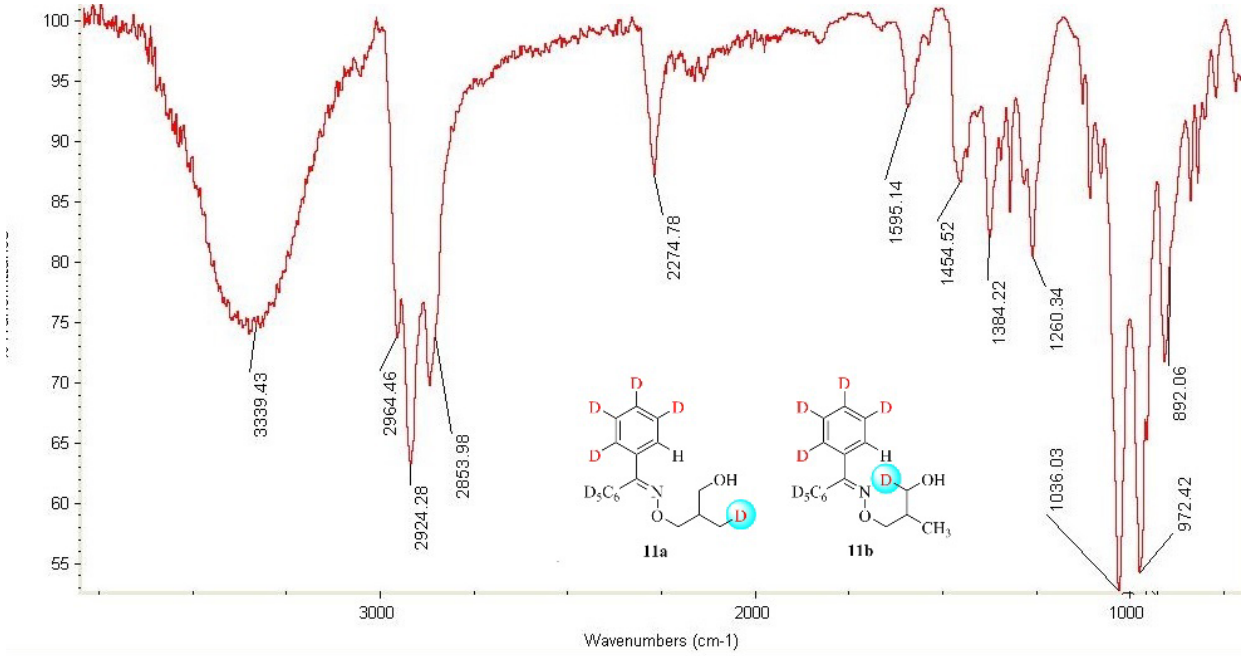

D8H8BzMe - orthoOH - 1H

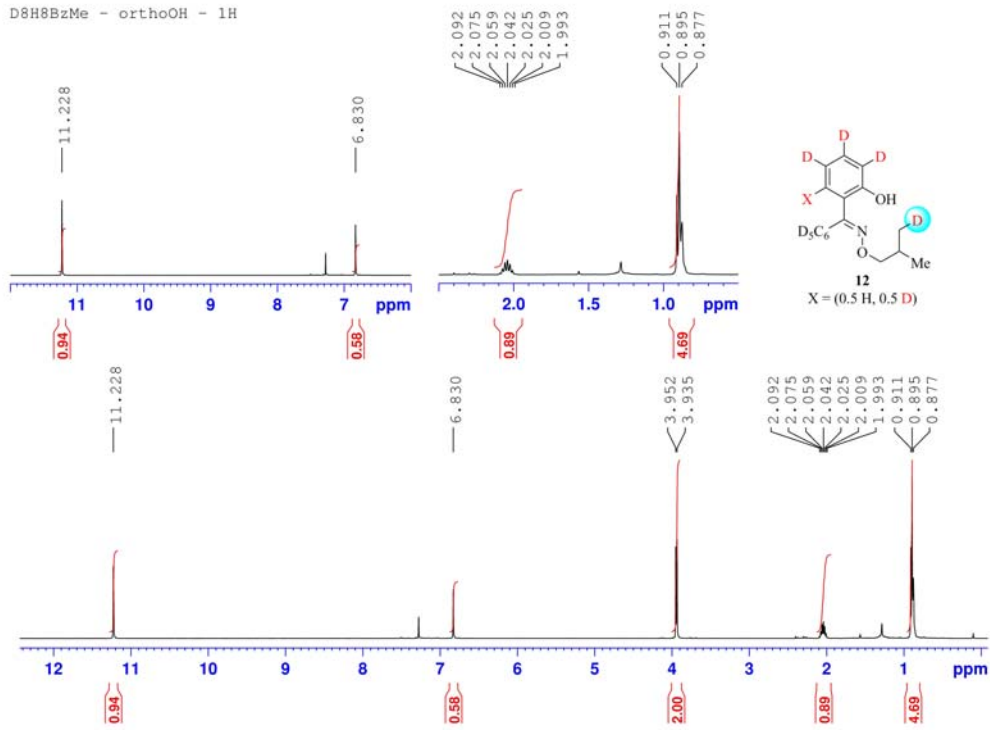

D8H8BzMe - orthoOH - HSQC

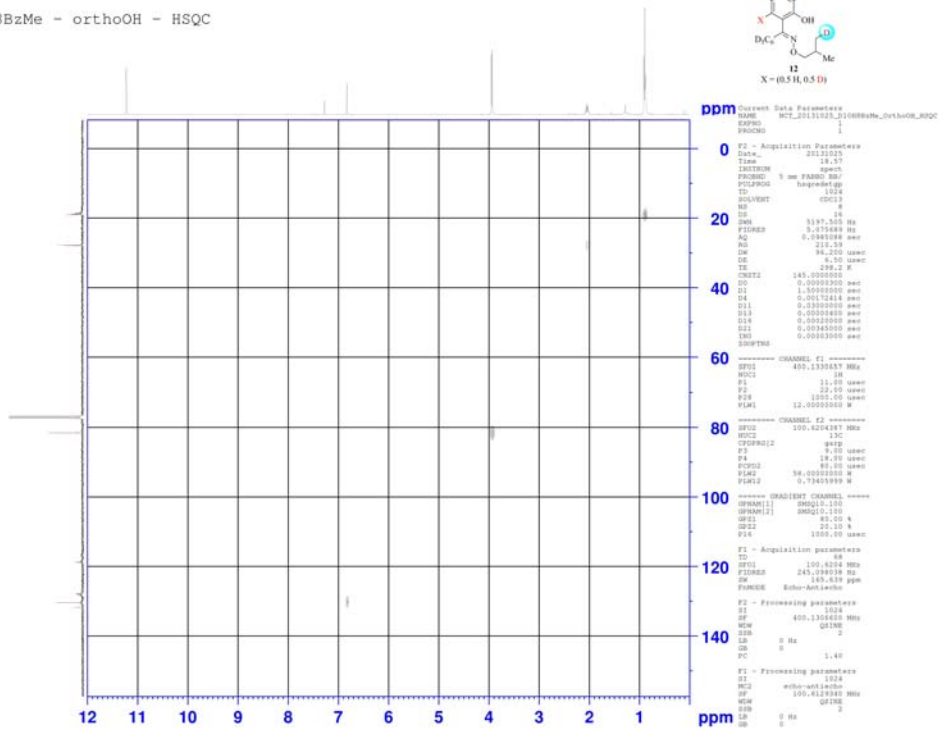

Supporting info for Thacker, Shoba, Geis, and Takacs

D8H8BzMe - orthoOH - HSQC

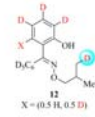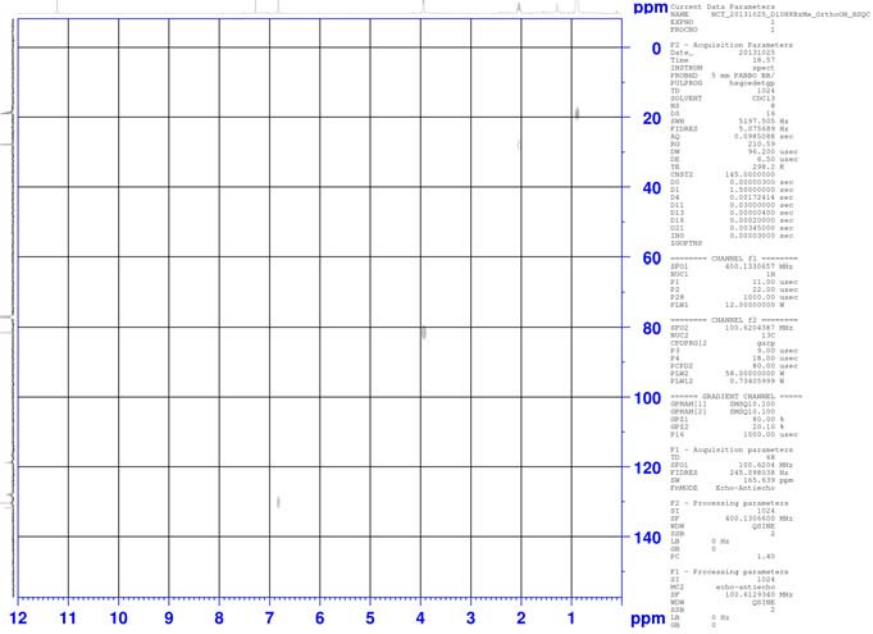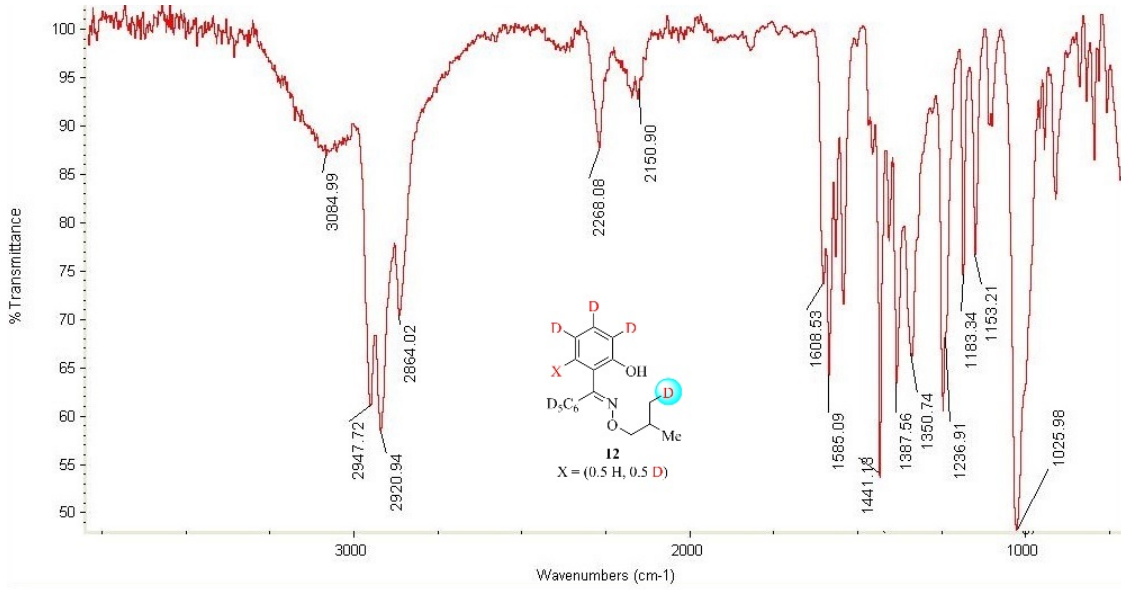

D9H-Benzophenone- Methyl Substituent - Reduced - 1H

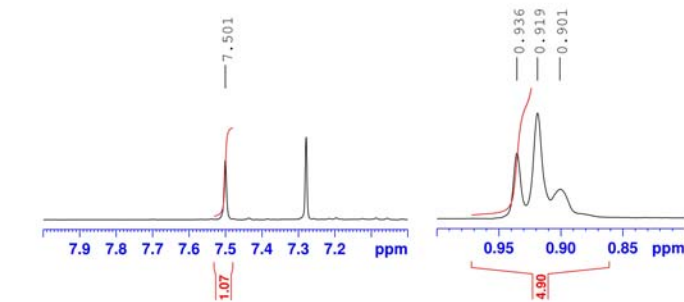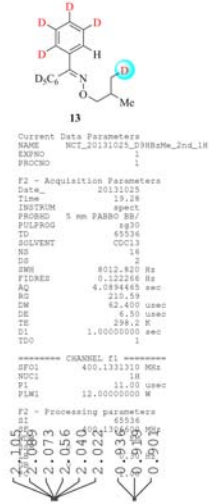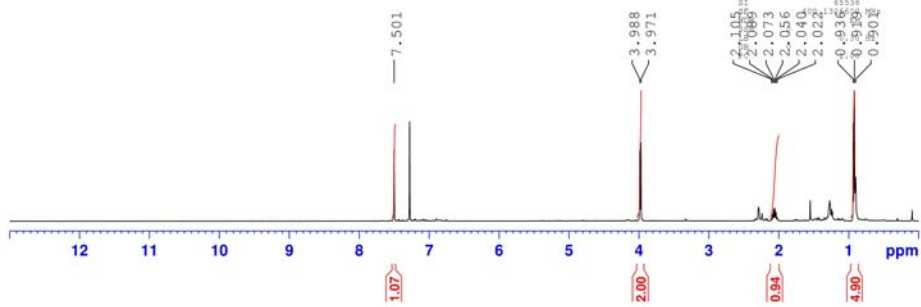

D9H-Benzophenone- Methyl Substituent - Reduced - 13C

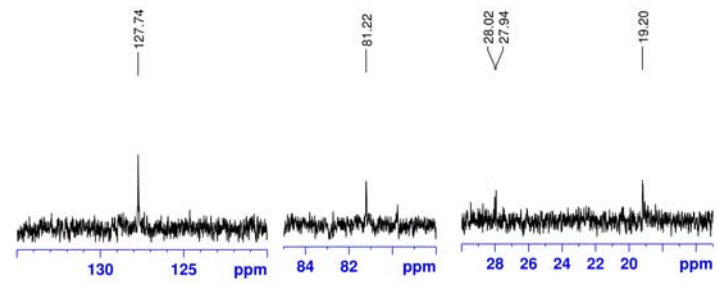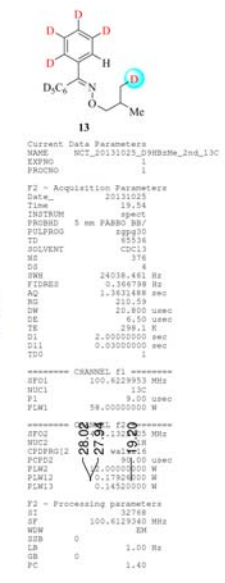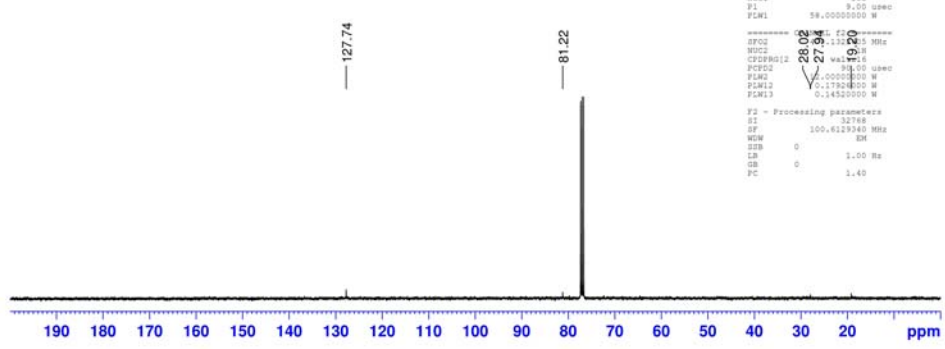



Supporting info for Thacker, Shoba, Geis, and Takacs

D9Benzophenone- Methyl Substituent - Reduced - HSQC

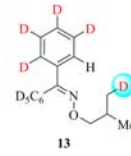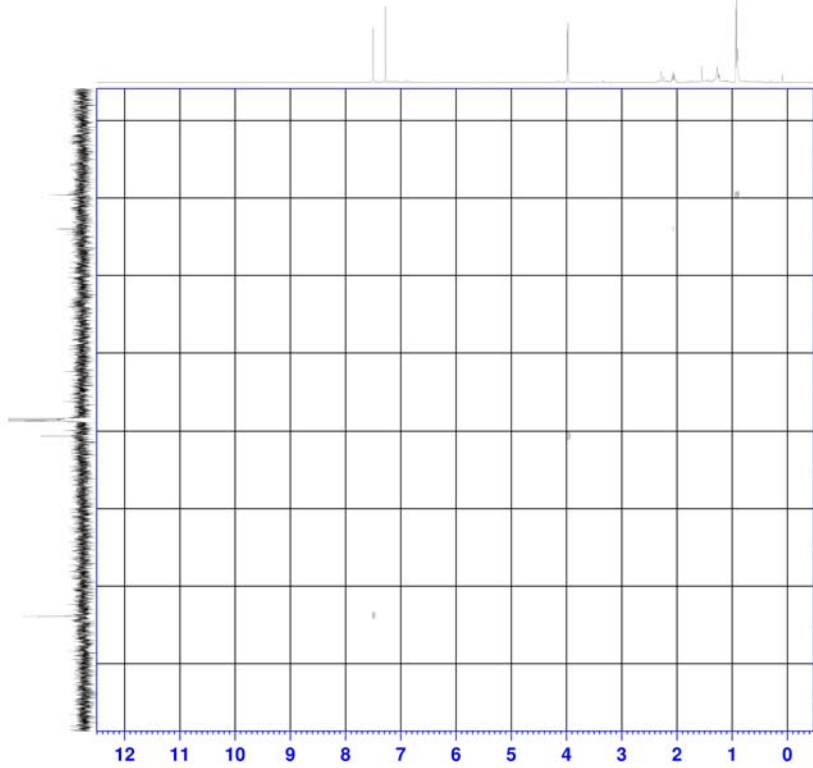

**ppm**

```

Current Data Parameters
NAME      NCT_20131015_095856h_2nd_HSQC
PROCNO    1
F2 - Acquisition Parameters
Date_     20131015
Time      20.25
INSTRUM   spect
PROBHD    5 mm PABBO BB/
PULPROG   zgpg30
TD         1024
SOLVENT   CDCl3
NS         4
DS         4
FIDRES    5197.505 Hz
AQ         0.098508 sec
RG         210.50
AQ         96.200 usec
DE         6.50 usec
TE         298.2 K
CMT2      149.000000
D0         0.0000000 sec
D1         1.5000000 sec
D4         0.0017814 sec
D11        0.0300000 sec
D13        0.0000000 sec
D14        0.0000000 sec
D15        0.0034500 sec
D16        0.0000000 sec
===== CHANNEL f1 =====
NUC1       13C
P1         11.00 usec
P2         22.00 usec
PC1        100.00 usec
PC2        12.0000000 W
===== CHANNEL f2 =====
NUC2       1H
PCPFGP2    949
P3         9.00 usec
P4         18.00 usec
PCPD2     85.00 usec
PLM2      58.0000000 W
PLM3      0.7340599 W
===== GRADIENT CHANNEL =====
GPRM[1]    HMGC1-100
GPRM[2]    HMGC1-100
GPE1       20.10 A
GPE2       20.10 A
GPF1       1000.00 usec
F1 - Acquisition parameters
TD         124
F2F2       100.626 MHz
FIDRES     134.40800 Hz
AQ         145.430 ppm
FANCODE    Echo-Antiecho
F2 - Processing parameters
SI         1024
SF         400.1304600 MHz
WDW        QMINE
SSB         0
LB         0 Hz
GB         0
PC         1.40
F1 - Processing parameters
SI         1024
MC2       echo-antiecho
SF         100.623940 MHz
WDW        QMINE
SSB         0
LB         0 Hz
GB         0
    
```
